# Supplementary material for: Virotherapy Using Myxoma Virus Prevents Lethal Graft-versus-Host Disease following Xeno-Transplantation with Primary Human Hematopoietic Stem Cells
Source: PLoS One. 2012 Aug 14;7(8):e43298. doi: 10.1371/journal.pone.0043298 (PMC3419197; doi:10.1371/journal.pone.0043298)
Supplement: Table S1 — Development of GVHD in xeno-transplanted mice requires human CD3+ lymphocytes in the donor graft sample. Sublethally irradiated NSG mice were transplanted with various human hematopoietic cell products and each cohort was observed for 6–8 weeks after transplant. Mice were sacrificed when their body condition score measured 2 (reported as death). Significance between survival of mice in the irradiated mock injected cohort and other cohorts was determined using the log-rank test (P<0.05). NS = not significant. N/A = not applicable. (XLSX) [file pone.0043298.s002.xlsx]

## Sheet: Sheet1
GVHD in NSG mice is caused by CD3+ lymphocytes
	Irradiation	# of Cells Injected	CD3+ Cells	N	Deaths	P (log rank test compared to mock)	Days to Death
Mock	No	None	No	20	0	N/A	N/A
BM	No	10000000	Yes	15	0	NS	N/A
BM + MYXV	No	10000000	Yes	17	0	NS	N/A
Mock	Yes	None	No	13	1	N/A	14 +/- 0
Cancer Cells	Yes	10000000	No	20	0	NS	N/A
Cancer Cells + MYXV	Yes	10000000	No	20	0	NS	N/A
BM	Yes	10000000	Yes	36	25	p = 0.0001	31.3 +/- 3.9
BM + MYXV	Yes	10000000	Yes	36	0	NS	N/A
CD34- BM	Yes	10000000	Yes	10	8	p = 0.0005	41.2 +/- 3.4
CD34- BM + MYXV	Yes	10000000	Yes	10	0	NS	N/A
CD34+	Yes	100000	No	10	0	NS	N/A
CD34+ + MYXV	Yes	100000	No	10	0	NS	N/A
CD3- BM	Yes	10000000	No	8	0	NS	N/A
CD3- BM + MYXV	Yes	10000000	No	9	0	NS	N/A
CD3+	Yes	1000000	Yes	6	5	p = 0.001	42.6 +/- 6.2
CD3+ +MYXV	Yes	1000000	Yes	6	0	NS	N/A
PBMC	Yes	5000000	Yes	5	4	p = 0.002	40.7 +/- 0.5
PBMC + MYXV	Yes	5000000	Yes	5	0	NS	N/A
